# Supplementary material for: Molecular Analysis of Ciprofloxacin Resistance Mechanisms in Malaysian ESBL-Producing Klebsiella pneumoniae Isolates and Development of Mismatch Amplification Mutation Assays (MAMA) for Rapid Detection of gyrA and parC Mutations
Source: PubMed Central journal article supplement (PMC4000930; doi:10.1155/2014/601630), 2014-04-10
Supplement: 601630.f1.pdf [file 601630.f1.pdf]

| ID   | PFGE group | PMQR genes           |                      | MAMA PCR results |           |           |
|------|------------|----------------------|----------------------|------------------|-----------|-----------|
|      |            |                      |                      | <i>gyrA</i>      |           | <i>pa</i> |
|      |            | <i>qnr</i>           | <i>aac(6')-Ib-cr</i> | 83               | 87        | 80        |
| K52  | A1         | -VE                  | -VE                  | mutation         | mutation  | mutation  |
| K109 | A1         | -VE                  | -VE                  | mutation         | mutation  | mutation  |
| K130 | A1         | -VE                  | -VE                  | mutation         | mutation  | mutation  |
| M15  | A1         | -VE                  | -VE                  | mutation         | mutation  | mutation  |
| M27  | A1         | -VE                  | -VE                  | mutation         | mutation  | mutation  |
| M44  | A1         | -VE                  | -VE                  | mutation         | mutation  | mutation  |
| M49  | A1         | -VE                  | -VE                  | mutation         | mutation  | mutation  |
| M56  | A1         | -VE                  | -VE                  | mutation         | mutation  | mutation  |
| M63  | A1         | -VE                  | -VE                  | mutation         | mutation  | mutation  |
| M71  | A1         | -VE                  | -VE                  | mutation         | mutation  | mutation  |
| M74  | A1         | -VE                  | -VE                  | mutation         | mutation  | mutation  |
| M82  | A1         | -VE                  | Positive             | mutation         | mutation  | mutation  |
| M99  | A1         | -VE                  | Positive             | mutation         | mutation  | mutation  |
| M102 | A1         | -VE                  | -VE                  | mutation         | mutation  | mutation  |
| M35  | A2         | <i>qnrB</i>          | Positive             | Wild type        | Wild type | Wild type |
| K14  | A3         | <i>qnrB (qnrB7)*</i> | -VE                  | mutation         | Wild type | Wild type |
| M5   | A3         | -VE                  | -VE                  | mutation         | Wild type | Wild type |
| M21  | A3         | -VE                  | -VE                  | mutation         | Wild type | Wild type |
| M58  | A3         | <i>qnrB</i>          | -VE                  | mutation         | Wild type | Wild type |
| M60  | A3         | <i>qnrB (qnrB7)</i>  | -VE                  | mutation         | Wild type | Wild type |
| M91  | A3         | <i>qnrB</i>          | -VE                  | mutation         | Wild type | Wild type |
| M92  | A3         | <i>qnrB</i>          | -VE                  | mutation         | Wild type | Wild type |
| M104 | A3         | <i>qnrB</i>          | -VE                  | mutation         | Wild type | Wild type |
| M69  | A4         | -VE                  | -VE                  | mutation         | mutation  | mutation  |
| M37  | A5         | <i>qnrB</i>          | Positive             | Wild type        | Wild type | Wild type |
| M96  | A6         | <i>qnrB</i>          | Positive             | Wild type        | Wild type | Wild type |
| K114 | A7         | <i>qnrB</i>          | Positive             | Wild type        | Wild type | Wild type |
| M66  | A7         | <i>qnrB</i>          | Positive             | Wild type        | Wild type | Wild type |
| M70  | A7         | <i>qnrB</i>          | Positive             | Wild type        | Wild type | Wild type |
| M73  | A7         | <i>qnrB</i>          | Positive             | Wild type        | Wild type | Wild type |
| M75  | A8         | <i>qnrB</i>          | Positive             | Wild type        | Wild type | Wild type |
| K126 | A9         | -VE                  | Positive             | Wild type        | Wild type | Wild type |
| M80  | A9         | -VE                  | Positive             | Wild type        | Wild type | Wild type |
| M93  | A9         | -VE                  | Positive             | Wild type        | Wild type | Wild type |
| M4   | A10        | <i>qnrB</i>          | Positive             | Wild type        | Wild type | Wild type |
| M33  | A10        | <i>qnrB</i>          | Positive             | Wild type        | Wild type | Wild type |
| M46  | A10        | <i>qnrB</i>          | Positive             | Wild type        | Wild type | Wild type |
| M50  | A10        | <i>qnrB</i>          | Positive             | Wild type        | Wild type | Wild type |
| M67  | A10        | <i>qnrB</i>          | Positive             | Wild type        | Wild type | Wild type |
| M78  | A10        | <i>qnrB</i>          | Positive             | Wild type        | Wild type | Wild type |

|      |     |                     |          |           |           |           |
|------|-----|---------------------|----------|-----------|-----------|-----------|
| M30  | A11 | <i>qnrB</i>         | Positive | Wild type | Wild type | Wild type |
| M98  | A12 | -VE                 | Positive | Wild type | Wild type | Wild type |
| M103 | A13 | -VE                 | Positive | Wild type | Wild type | Wild type |
| K22  | A14 | -VE                 | Positive | Wild type | Wild type | Wild type |
| K92  | A14 | -VE                 | -VE      | Wild type | Wild type | Wild type |
| M38  | A14 | <i>qnrB (qnrB1)</i> | Positive | Wild type | Wild type | Wild type |
| M81  | A14 | -VE                 | -VE      | Wild type | Wild type | Wild type |
| M84  | A15 | -VE                 | Positive | Wild type | Wild type | Wild type |
| K106 | A16 | <i>qnrB (qnrB6)</i> | Positive | mutation  | Wild type | Wild type |
| M40  | A16 | <i>qnrB</i>         | Positive | mutation  | Wild type | Wild type |
| K129 | A16 | -VE                 | Positive | Wild type | Wild type | Wild type |
| M105 | A16 | <i>qnrB</i>         | Positive | Wild type | Wild type | Wild type |
| M85  | A17 | <i>qnrB</i>         | Positive | Wild type | Wild type | Wild type |
| M90  | A17 | <i>qnrB</i>         | Positive | Wild type | Wild type | Wild type |
| M95  | A17 | <i>qnrB</i>         | Positive | Wild type | Wild type | Wild type |
| M32  | A18 | -VE                 | Positive | Wild type | Wild type | Wild type |
| M51  | A18 | <i>qnrB</i>         | Positive | Wild type | Wild type | Wild type |
| M107 | A18 | <i>qnrB</i>         | Positive | Wild type | Wild type | Wild type |
| M65  | A19 | <i>qnrB</i>         | Positive | Wild type | Wild type | Wild type |
| M100 | A19 | <i>qnrB</i>         | Positive | Wild type | Wild type | Wild type |
| K27  | A20 | <i>qnrB (qnrB1)</i> | Positive | mutation  | Wild type | mutation  |
| M52  | A20 | <i>qnrB</i>         | Positive | mutation  | Wild type | mutation  |
| M77  | A20 | <i>qnrB</i>         | Positive | mutation  | Wild type | mutation  |
| M89  | A21 | <i>qnrB</i>         | Positive | Wild type | Wild type | Wild type |
| M11  | A22 | -VE                 | Positive | Wild type | Wild type | Wild type |
| M79  | A23 | <i>qnrB (qnrB6)</i> | Positive | Wild type | Wild type | Wild type |
| K66  | A24 | -VE                 | -VE      | mutation  | Wild type | mutation  |
| M61  | A25 | <i>qnrB (qnrB1)</i> | -VE      | Wild type | Wild type | Wild type |
| M87  | A25 | -VE                 | Positive | Wild type | Wild type | Wild type |
| M59  | A26 | <i>qnrB</i>         | Positive | Wild type | Wild type | Wild type |
| M86  | A27 | -VE                 | -VE      | mutation  | Wild type | mutation  |
| M2   | A28 | <i>qnrB</i>         | Positive | mutation  | Wild type | mutation  |
| M57  | A28 | <i>qnrB</i>         | Positive | mutation  | Wild type | mutation  |
| M106 | A28 | <i>qnrB</i>         | Positive | mutation  | Wild type | mutation  |
| M109 | A28 | <i>qnrB</i>         | Positive | mutation  | Wild type | mutation  |
| M111 | A28 | <i>qnrB</i>         | Positive | mutation  | Wild type | mutation  |
| M48  | A29 | <i>qnrB</i>         | Positive | Wild type | Wild type | Wild type |
| M110 | B1  | <i>qnrB</i>         | -VE      | Wild type | Wild type | Wild type |
| K24  | B2  | <i>qnrB (qnrB6)</i> | Positive | Wild type | Wild type | Wild type |
| K40  | B3  | <i>qnrB</i>         | Positive | Wild type | Wild type | Wild type |
| NDM  | C1  | <i>qnrB</i>         | Positive | mutation  | mutation  | mutation  |
| M36  | C2  | <i>qnrB</i>         | Positive | mutation  | mutation  | Wild type |
| K50  | D1  | -VE                 | -VE      | mutation  | Wild type | mutation  |

|      |    |                     |          |                  |                  |                  |
|------|----|---------------------|----------|------------------|------------------|------------------|
| K112 | D1 | -VE                 | -VE      | <b>mutation</b>  | <b>Wild type</b> | <b>mutation</b>  |
| M13  | D1 | -VE                 | -VE      | <b>mutation</b>  | <b>Wild type</b> | <b>mutation</b>  |
| M28  | D1 | -VE                 | -VE      | <b>mutation</b>  | <b>Wild type</b> | <b>mutation</b>  |
| K12  | D2 | <i>qnrS</i>         | -VE      | <b>Wild type</b> | <b>Wild type</b> | <b>Wild type</b> |
| M72  | D3 | <i>qnrB</i>         | Positive | <b>Wild type</b> | <b>Wild type</b> | <b>Wild type</b> |
| M1   | E1 | <i>qnrB</i>         | Positive | <b>Wild type</b> | <b>Wild type</b> | <b>Wild type</b> |
| M68  | E1 | <i>qnrB</i>         | Positive | <b>Wild type</b> | <b>Wild type</b> | <b>Wild type</b> |
| K103 | E2 | -VE                 | Positive | <b>Wild type</b> | <b>Wild type</b> | <b>Wild type</b> |
| M47  | E3 | <i>qnrB</i>         | Positive | <b>Wild type</b> | <b>Wild type</b> | <b>Wild type</b> |
| K5   | E4 | <i>qnrB (qnrB1)</i> | Positive | <b>Wild type</b> | <b>Wild type</b> | <b>Wild type</b> |

\* *qnrB* alleles determined by sequencing































|           |                  |                  |   |   |           |
|-----------|------------------|------------------|---|---|-----------|
| Wild type | not done         | not done         | 0 | 2 | 2         |
| Wild type | not done         | not done         | 0 | 1 | 0.094     |
| Wild type | not done         | not done         | 0 | 1 | 0.25      |
| Wild type | not done         | not done         | 0 | 1 | 0.125     |
| Wild type | not done         | not done         | 0 | 0 | 0.047     |
| Wild type | not done         | not done         | 0 | 2 | 1         |
| Wild type | not done         | not done         | 0 | 0 | 0.032     |
| Wild type | not done         | not done         | 0 | 1 | 0.38      |
| mutation  | S83I             | E84K             | 2 | 4 | $\geq 32$ |
| mutation  | S83I             | E84K             | 2 | 4 | $\geq 32$ |
| Wild type | <b>Wild type</b> | <b>Wild type</b> | 0 | 1 | 0.19      |
| Wild type | <b>Wild type</b> | <b>Wild type</b> | 0 | 2 | 2         |
| Wild type | not done         | not done         | 0 | 2 | 2         |
| Wild type | not done         | not done         | 0 | 2 | 2         |
| Wild type | not done         | not done         | 0 | 2 | 2         |
| Wild type | not done         | not done         | 0 | 1 | 0.38      |
| Wild type | not done         | not done         | 0 | 2 | 2         |
| Wild type | not done         | not done         | 0 | 2 | 2         |
| Wild type | not done         | not done         | 0 | 2 | 2         |
| Wild type | not done         | not done         | 0 | 2 | 2         |
| Wild type | S83I             | S80I             | 2 | 4 | $\geq 32$ |
| Wild type | S83I             | not done         | 2 | 4 | $\geq 32$ |
| Wild type | not done         | S80I             | 2 | 4 | $\geq 32$ |
| Wild type | not done         | not done         | 0 | 2 | 2         |
| Wild type | not done         | not done         | 0 | 1 | 0.094     |
| Wild type | <b>Wild type</b> | <b>Wild type</b> | 0 | 2 | $\geq 32$ |
| Wild type | S83I             | S80R             | 2 | 2 | $\geq 32$ |
| Wild type | not done         | not done         | 0 | 1 | 0.75      |
| Wild type | not done         | not done         | 0 | 1 | 0.125     |
| Wild type | not done         | not done         | 0 | 2 | 2         |
| Wild type | not done         | S80I             | 2 | 2 | $\geq 32$ |
| Wild type | S83I             | S80I             | 2 | 4 | $\geq 32$ |
| Wild type | not done         | not done         | 2 | 4 | $\geq 32$ |
| Wild type | not done         | S80I             | 2 | 4 | $\geq 32$ |
| Wild type | not done         | not done         | 2 | 4 | $\geq 32$ |
| Wild type | not done         | not done         | 2 | 4 | $\geq 32$ |
| Wild type | not done         | not done         | 2 | 4 | $\geq 32$ |
| Wild type | not done         | not done         | 0 | 2 | 2         |
| Wild type | not done         | not done         | 0 | 1 | 0.5       |
| Wild type | <b>Wild type</b> | not done         | 0 | 2 | 2         |
| Wild type | not done         | <b>Wild type</b> | 0 | 2 | 2         |
| Wild type | not done         | S80I             | 3 | 5 | $\geq 32$ |
| Wild type | not done         | not done         | 2 | 4 | $\geq 32$ |
| Wild type | S83I             | S80I             | 2 | 2 | 4         |

|                  |                  |                  |   |   |       |
|------------------|------------------|------------------|---|---|-------|
| <b>Wild type</b> | S83I             | S80I             | 2 | 2 | 4     |
| <b>Wild type</b> | S83I             | S80I             | 2 | 2 | 6     |
| <b>Wild type</b> | S83I             | S80I             | 2 | 2 | 6     |
| <b>Wild type</b> | not done         | not done         | 0 | 1 | 0.5   |
| <b>Wild type</b> | not done         | not done         | 0 | 2 | 1     |
| <b>Wild type</b> | not done         | not done         | 0 | 2 | 2     |
| <b>Wild type</b> | not done         | not done         | 0 | 2 | 2     |
| <b>Wild type</b> | not done         | not done         | 0 | 1 | 0.094 |
| <b>Wild type</b> | not done         | not done         | 0 | 2 | 2     |
| <b>Wild type</b> | <b>Wild type</b> | <b>Wild type</b> | 0 | 2 | 2     |



























| oxacin    |
|-----------|
| phenotype |
| R         |
| R         |
| R         |
| R         |
| R         |
| R         |
| R         |
| R         |
| R         |
| R         |
| R         |
| R         |
| R         |
| R         |
| R         |
| I         |
| S         |
| S         |
| S         |
| S         |
| I         |
| I         |
| S         |
| I         |
| <b>R</b>  |
| S         |
| I         |
| I         |
| I         |
| I         |
| I         |
| S         |
| S         |
| S         |
| S         |
| I         |
| S         |
| I         |
| I         |
| I         |
| I         |

|          |
|----------|
| I        |
| S        |
| S        |
| S        |
| S        |
| S        |
| S        |
| S        |
| <b>R</b> |
| <b>R</b> |
| S        |
| I        |
| I        |
| I        |
| I        |
| S        |
| I        |
| I        |
| I        |
| I        |
| I        |
| <b>R</b> |
| <b>R</b> |
| <b>R</b> |
| I        |
| S        |
| <b>R</b> |
| <b>R</b> |
| S        |
| S        |
| I        |
| <b>R</b> |
| <b>R</b> |
| <b>R</b> |
| <b>R</b> |
| <b>R</b> |
| <b>R</b> |
| I        |
| S        |
| I        |
| I        |
| <b>R</b> |
| <b>R</b> |
| <b>R</b> |



|          |
|----------|
| <b>R</b> |
| <b>R</b> |
| <b>R</b> |
| S        |
| S        |
| I        |
| I        |
| S        |
| I        |
| I        |



















|
